# Supplementary material
Source: publisher site journal article supplement (https://www.dovepress.com/article/496736)
Supplement: Supplementary file 1 [file get_supplementary_file.php]

**Supplement**

**Supplemental methods/results**

**Definitions**

**International Headache Society definition of migraine day** **for controlled trials**1: A day with a headache that lasts ≥4 hours; meets the International Classification of Headache Disorders definition2(ICHD)-III criteria C and D for migraine without aura (1.1), B and C for migraine with aura (1.2), or ICHD-III criteria for probable migraine (1.6); or a day with a headache that is successfully treated with a triptan, ergotamine, or other migraine-speciﬁc acute medication.

**International Headache Society** **definition of moderate/severe headache day for controlled trials**1: A day with moderate or severe pain that lasts ≥4 hours or a day with a headache that is successfully treated by an acute headache medication.

**Migraine Symptom Severity Score (MSS)**

Having fewer headaches is important to feel healthy. Whether you have few headaches, or a lot of headaches, please try to answer the following question the best you can. Please describe the pain and other symptoms you have with your headaches. If you have more than one type of headache, please answer for your most severe type of headache. How often did you experience each of the following with your most severe type of headache?

|  | SELECT ONE RESPONSE FOR EACH | Never  [1] | Rarely [2] | Less Than Half the Time  [3] | Half the Time or More  [4] | All or Nearly All of the Time  [5] |
| --- | --- | --- | --- | --- | --- | --- |
| A | The pain is worse on just one side | [ ] | [ ] | **[ ]** | **[ ]** | **[ ]** |
| B | The pain is pounding, pulsating, or throbbing | [ ] | [ ] | **[ ]** | **[ ]** | **[ ]** |
| C | The pain has moderate or severe intensity | [ ] | [ ] | **[ ]** | **[ ]** | **[ ]** |
| D | The pain is made worse by routine activities such as walking or climbing stairs | [ ] | [ ] | **[ ]** | **[ ]** | **[ ]** |
| E | You feel nauseated or sick to your stomach | [ ] | [ ] | [ ] | [ ] | [ ] |
| F | Light bothers you (more than when you do not have headaches) | [ ] | [ ] | [ ] | [ ] | [ ] |
| G | Sound bothers you (more than when you do not have headaches) | [ ] | [ ] | [ ] | [ ] | [ ] |
| H | You vomit | [ ] | [ ] | [ ] | [ ] | [ ] |

A ‘qualifying’ individual, must select “less than half the time (3)”, “half the time or more (4)” or “all or nearly all the time (5)” to any 2 or more of the 4 pain symptoms (A to D) AND to “Nausea” (E) OR BOTH “photophobia” (F) AND ”phonophobia” (G).

**Qualitative pilot testing**

Thirteen patients were recruited for qualitative pilot interviews. The interviews were designed to assess if the selected DCE attributes and levels were relevant, tradeable, and understandable by patients and whether the questionnaire was acceptable, clear, and complete. Interviews were conducted on web-based software, with screen-sharing of DCE materials between the interviewer and patient. During the interviews, patients completed the DCE survey. Patients were asked to state their thoughts aloud while completing the survey during the interview. An experienced interviewer probed patients carefully during the preference elicitation to understand if patients were trading the different attributes and levels. After the patient completed the questionnaire, the interviewer asked patients to discuss selected DCE choice tasks to assess the internal validity of the responses and confirm the completeness and relevance of the included treatment attributes. Results from the interviews were used to iteratively refine attribute presentation and wording. Minor changes were made to the survey based on patients’ input. These included changes to the wording of attribute levels or definitions to improve clarity; the addition of background information about treatment features; the improvement of visualizations for clarity; the refinement of patient-friendly medical terms; and updates to attribute icons.

**Quantitative pilot testing**

Quantitative pilot testing of the DCE was performed to test if attribute levels covered the preference-relevant range and identify prior parameter estimates that could be used to update the DCE experimental design, allowing for more precise parameter estimates in the final analysis. 3 Overall, 101 patients were recruited. Data quality indicators outperformed those observed for similar studies in the literature, with 83% (n=84) making consistent choices in the stability test, 92% (n=93) passing the dominance test, 96% (n=97) considering both alternatives in the serial non-participation test, and 96% (n=97) making choices not in line with dominant decision-making. Furthermore, all attributes significantly affected patients’ treatment preferences, and the estimated multinomial logit model was able to explain the collected DCE choices (adjusted McFadden R2 = 5.8%). No changes were made to the attributes or levels.

**Statistics**

A D-efficient design ensures that the same amount of statistical information is collected for all preference parameters and maximizes the information collected about patient preferences in each choice task. 4 A normally distributed model had the best fit to the data (adjusted McFadden pseudo R2 = 61.7%) and was used to estimate marginal utilities and relative attribute importance (RAI). 5

In the DCE choice tasks, mode of administration was always presented as the first attribute, while the remaining attributes were randomized within the choice tasks. 6 Two attribute levels (“70% chance of reducing the number of migraine headache days by half” and “2 fewer days you take acute medication to treat migraine symptoms”) were never combined in a choice task to prevent a choice task that presented an unrealistic scenario. In addition, the location of the two treatment options (ie, left column or right column) was randomized. All randomizations were between respondents, not within respondents.

Marginal rates of substitution values were calculated using a mixed multinomial logit model that assumed log-normal distributions for the variable “chance of reducing migraine headache days by half.” Log-normal distributions are typically assumed for numerical attributes over which trade-offs are to be examined. All models were estimated in a Bayesian framework with fully correlated covariance matrices as per best practice; this means that results considered heterogeneity in terms of preference (ie, different individuals value things differently) and scale (ie, different groups may feel more or less strongly about all attributes). Two-sided z-tests with a 5% level of significance were used to determine whether estimated parameters were significantly different from zero.

The following patient characteristics were pre-specified and included in an interacted mixed multinomial logit model as interaction effects between treatment attributes: physician’s COD, sex, age, number of migraine headache days, MIDAS score, MSQ score, CGRP experience, and reluctance to self-inject. The mean effect of these patient characteristics on parameter estimates was used to obtain subgroup-specific RAI scores. A subgroup analysis was then conducted using interaction effects and assessed by the Bayesian information criterion.

**Supplemental Table 1 Patient demographic and clinical characteristics.**

| **Characteristic** | **No physician’s COD**  **(N=301; 50.1%)** | **Physician’s COD**  **(N=300; 49.9%)** | **P-Value** |
| --- | --- | --- | --- |
| **Sex (female), n (%a)** | 112 (37.2) | 83 (27.7) | 0.016a |
| **Racial background, n (%*)** |  |  | <0.001b |
| White | 239 (91.2) | 140 (67.3) |  |
| Black or African American | 9 (3.4) | 31 (14.9) |  |
| Asian | 2 (0.8) | 17 (8.2) |  |
| Native Hawaiian or other Pacific Islander | 0 (0.0) | 4 (1.9) |  |
| American Indian or Alaska Native | 8 (3.1) | 5 (2.4) |  |
| Prefer not to say | 4 (1.5) | 11 (5.3) |  |
| **Ethnic background, n (%)** |  |  | <0.001a |
| Hispanic or Latino | 38 (12.6) | 75 (25.0) |  |
| Not Hispanic or Latino | 262 (87.0) | 208 (69.3) |  |
| Prefer not to say | 1 (0.3) | 17 (5.7) |  |
| **Educational background, n (%a)** |  |  | <0.001b |
| High school or less | 33 (11.0) | 71 (23.6) |  |
| Some college / university | 96 (31.9) | 98 (32.7) |  |
| College / university | 93 (30.9) | 92 (30.7) |  |
| Post graduate degree | 79 (26.2) | 39 (13.0) |  |
| **Mean migraine headache days/month in past 3 months, n (%a)** |  |  | 0.511a |
| 4–7 | 152 (50.5) | 142 (47.3) |  |
| 8–11 | 104 (34.6) | 103 (34.3) |  |
| 12–14 | 45 (15.0) | 55 (18.3) |  |
| **Mean headache days/month in the past 3 months, n (%)** |  |  | 0.001a |
| 4–7 | 88 (29.2) | 83 (27.7) |  |
| 8–11 | 130 (43.2) | 87 (29.0) |  |
| 12–14 | 83 (27.6) | 130 (43.3) |  |
| **Age at first diagnosis of migraine (years), mean (SD)** | 27.1 (11.0) | 29.8 (12.5) | 0.02 c |
| **Prior use of a self-injectable for any health condition, n (%)** |  |  | 0.016 a |
| No | 144 (47.8) | 137 (45.7) |  |
| Yes | 157 (52.2) | 163 (54.3) |  |
| **Fear of self-injection, n (%)** |  |  | <0.001a |
| Not at all | 73 (24.3) | 145 (48.3) |  |
| A little | 60 (19.9) | 69 (23.0) |  |
| Moderately | 99 (32.9) | 54 (18.0) |  |
| Very | 52 (17.3) | 15 (5.0) |  |
| Extremely | 17 (5.6) | 17 (5.7) |  |
| **Prior use of preventive treatments for your migraine, n (%)** |  |  |  |
| No, never used | 89 (29.6%) | 91 (30.3%) | 0.908 a |
| Yes, currently using† | 137 (45.5) | 135 (45.0) | 0.964a |
| Yes, have used in the past† | 88 (29.2) | 85 (28.3) | 0.877a |
| **MSSS score, mean (SD)** | 31.2 (4.3) | 33.7 (4.2) | <0.001 |
| **PGI-S score, mean (SD)** | 4.0 (1.0) | 4.4 (1.2) | <0.001 |
| **MSQ score, mean (SD)** | 44.2 (19.2) | 50.3 (19.5) | <0.001 |
| **MIDAS score, mean (SD)** | 34.3 (40.6) | 49.0 (35.4) | <0.001 |

*****Percentages per given category, ie, denominator is 262 in no physician’s COD group and 208 in physician’s COD group which are the sum of available responses per given category; †the two “Yes” categories were not mutually exclusive as both could be true for one patient

Abbreviations: physician’s COD, confirmation of diagnosis; MIDAS, Migraine Disability Assessment; MSQ, Migraine-Specific Quality of Life Questionnaire; MSSS, Migraine Symptom Severity Score; PGI-S, Patient Global Impression of Severity; SD, standard deviation.

Statistical tests: (a) standard chi-2 test of proportions; (b) simulated chi-2 test of proportions; (c) Wilcoxon test of medians.

**Supplemental Table 2** **Health literacy SBSQ scores.**

| **Items** | **Overall (N=601)** | **No physician’s COD**  **(N=301; 50.1%)** | **Physician’s COD**  **(N=300; 49.9%)** | **P-Value** |
| --- | --- | --- | --- | --- |
| **Health literacya** |  |  |  | 0.001 (a) |
| Low (average score ≤2) | 94 (15.6%) | 64 (21.3%) | 30 (10.0%) |  |
| High (average score >2) | 507 (84.4%) | 237 (78.7%) | 270 (90.0%) |  |
| **How often do you have someone help you read hospital materials?b** |  |  |  | 0.001 (a) |
| (4) Never | 13 (2.2%) | 7 (2.3%) | 6 (2.0%) |  |
| (3) Occasionally | 66 (11.0%) | 52 (17.3%) | 14 (4.7%) |  |
| (2) Sometimes | 82 (13.6%) | 59 (19.6%) | 23 (7.7%) |  |
| (1) Often | 121 (20.1%) | 52 (17.3%) | 69 (23.0%) |  |
| (0) Always | 319 (53.1%) | 131 (43.5%) | 188 (62.7%) |  |
| **How confident are you filling out medical forms by yourself?b** |  |  |  | 0.067 (b) |
| (0) Not at all | 5 (0.8%) | 1 (0.3%) | 4 (1.3%) |  |
| (1) A little bit | 27 (4.5%) | 11 (3.7%) | 16 (5.3%) |  |
| (2) Somewhat | 73 (12.1%) | 41 (13.6%) | 32 (10.7%) |  |
| (3) Quite a bit | 167 (27.8%) | 95 (31.6%) | 72 (24.0%) |  |
| (4) Extremely | 329 (54.7%) | 153 (50.8%) | 176 (58.7%) |  |
| **How often do you have problems learning about your medical condition because of difficulty understanding written information?b** |  |  |  | 0.001 (a) |
| (4) Never | 7 (1.2%) | 4 (1.3%) | 3 (1.0%) |  |
| (3) Occasionally | 45 (7.5%) | 34 (11.3%) | 11 (3.7%) |  |
| (2) Sometimes | 84 (14.0%) | 54 (17.9%) | 30 (10.0%) |  |
| (1) Often | 145 (24.1%) | 53 (17.6%) | 92 (30.7%) |  |
| (0) Always | 320 (53.2%) | 156 (51.8%) | 164 (54.7%) |  |

**Abbreviations:** COD, confirmation of diagnosis; SBSQ, Set of Brief Screening Questions.

a Scoring literacy scale: Patients were given 1 point for each correctly answered question (maximum SBSQ score = 3). This was scored by averaging the sum of the scores across the three items. Each question assigns 0 (highest problems with reading) to 3 points (no problems with reading). Lower scores reflect greater problems with reading; scores ≤2 indicate inadequate health literacy, and scores >2 indicate adequate health literacy.

bPoint scale indicated within parentheses.

Statistical tests: (a) standard chi-2 test of proportions; (b) simulated chi-2 test of proportions.

**Supplemental Table 3 Health numeracy scores.**

| **Items** | **Overall (N=601)** | **No physician’s COD**  **(N=301; 50.1%)** | **Physician’s COD**  **(N=300; 49.9%)** | **P-Valueb** |
| --- | --- | --- | --- | --- |
| **Health numeracya** |  |  |  | 0.001 |
| Low (<3 correct answers) | 16 (2.7%) | 1 (0.3%) | 15 (5.0%) |  |
| High (≥3 correct answers) | 585 (97.3%) | 300 (99.7%) | 285 (95.0%) |  |
| **Question 1** |  |  |  | 0.001 |
| Correct: 1 in 10 | 495 (82.4%) | 228 (75.7%) | 267 (89.0%) |  |
| Incorrect: 1 in 100 and 1 in 1,000 | 106 (17.6%) | 73 (24.3%) | 33 (11.0%) |  |
| **Question 2** |  |  |  | 0.039 |
| Correct: 10% | 534 (88.9%) | 259 (86.0%) | 275 (91.7%) |  |
| Incorrect: 1% and 5% | 67 (11.1%) | 42 (14.0%) | 25 (8.3%) |  |
| **Question 3** |  |  |  | 0.002 |
| Correct: 10 | 569 (94.7%) | 294 (97.7%) | 275 (91.7%) |  |
| Incorrect: any numbers other than 10 | 32 (5.3%) | 7 (2.3%) | 25 (8.3%) |  |
| **Question 4** |  |  |  | 0.66 |
| Correct: 100 | 553 (92.0%) | 275 (91.4%) | 278 (92.7%) |  |
| Incorrect: any numbers other than 100 | 48 (8.0%) | 26 (8.6%) | 22 (7.3%) |  |
| **Question 5** |  |  |  | 0.236 |
| Correct: 20 | 563 (93.7%) | 286 (95.0%) | 277 (92.3%) |  |
| Incorrect: any numbers other than 20 | 38 (6.3%) | 15 (5.0%) | 23 (7.7%) |  |

**Abbreviations:** COD, confirmation of diagnosis.

a Numeracy Scale scoring: Numeracy was assessed with five questions from the Numeracy Scale. Patients were given 1 point for each correctly answered question (maximum numeracy score = 5). Lower scores reflect greater problems with numbers; scores <3 indicate inadequate health numeracy, and scores ≥3 indicate adequate health numeracy.bStandard chi-2 test of proportions.

**Supplemental Table 4 Data quality assessments.**

| **Validity Assessment** | **N=601** |
| --- | --- |
| **Dominance test** |  |
| Failed | 70 (11.6%) |
| Passed | 531 (88.4%) |
| **Stability test** |  |
| Inconsistent | 115 (19.1%) |
| Consistent | 486 (80.9%) |
| **Dominated decision-making** |  |
| Chance of migraine reduction | 17 (2.8%) |
| Reduction in acute medication | 5 (0.8%) |
| Onset of treatment effect | 5 (0.8%) |
| Impact on daily activities | 25 (4.2%) |
| None | 549 (91.3%) |
| **Serial non-participation** |  |
| Always choosing A | 3 (0.5%) |
| Always choosing B | 7 (1.2%) |
| None | 591 (98.3%) |
| **Response time (min) DCE tasks** |  |
| <3.00 | 296 (49.3%) |
| ≥3.00 | 305 (50.7%) |

**Abbreviations:** DCE, discrete choice experiment.

**Supplemental Figure 1 RAI by subgroup.**


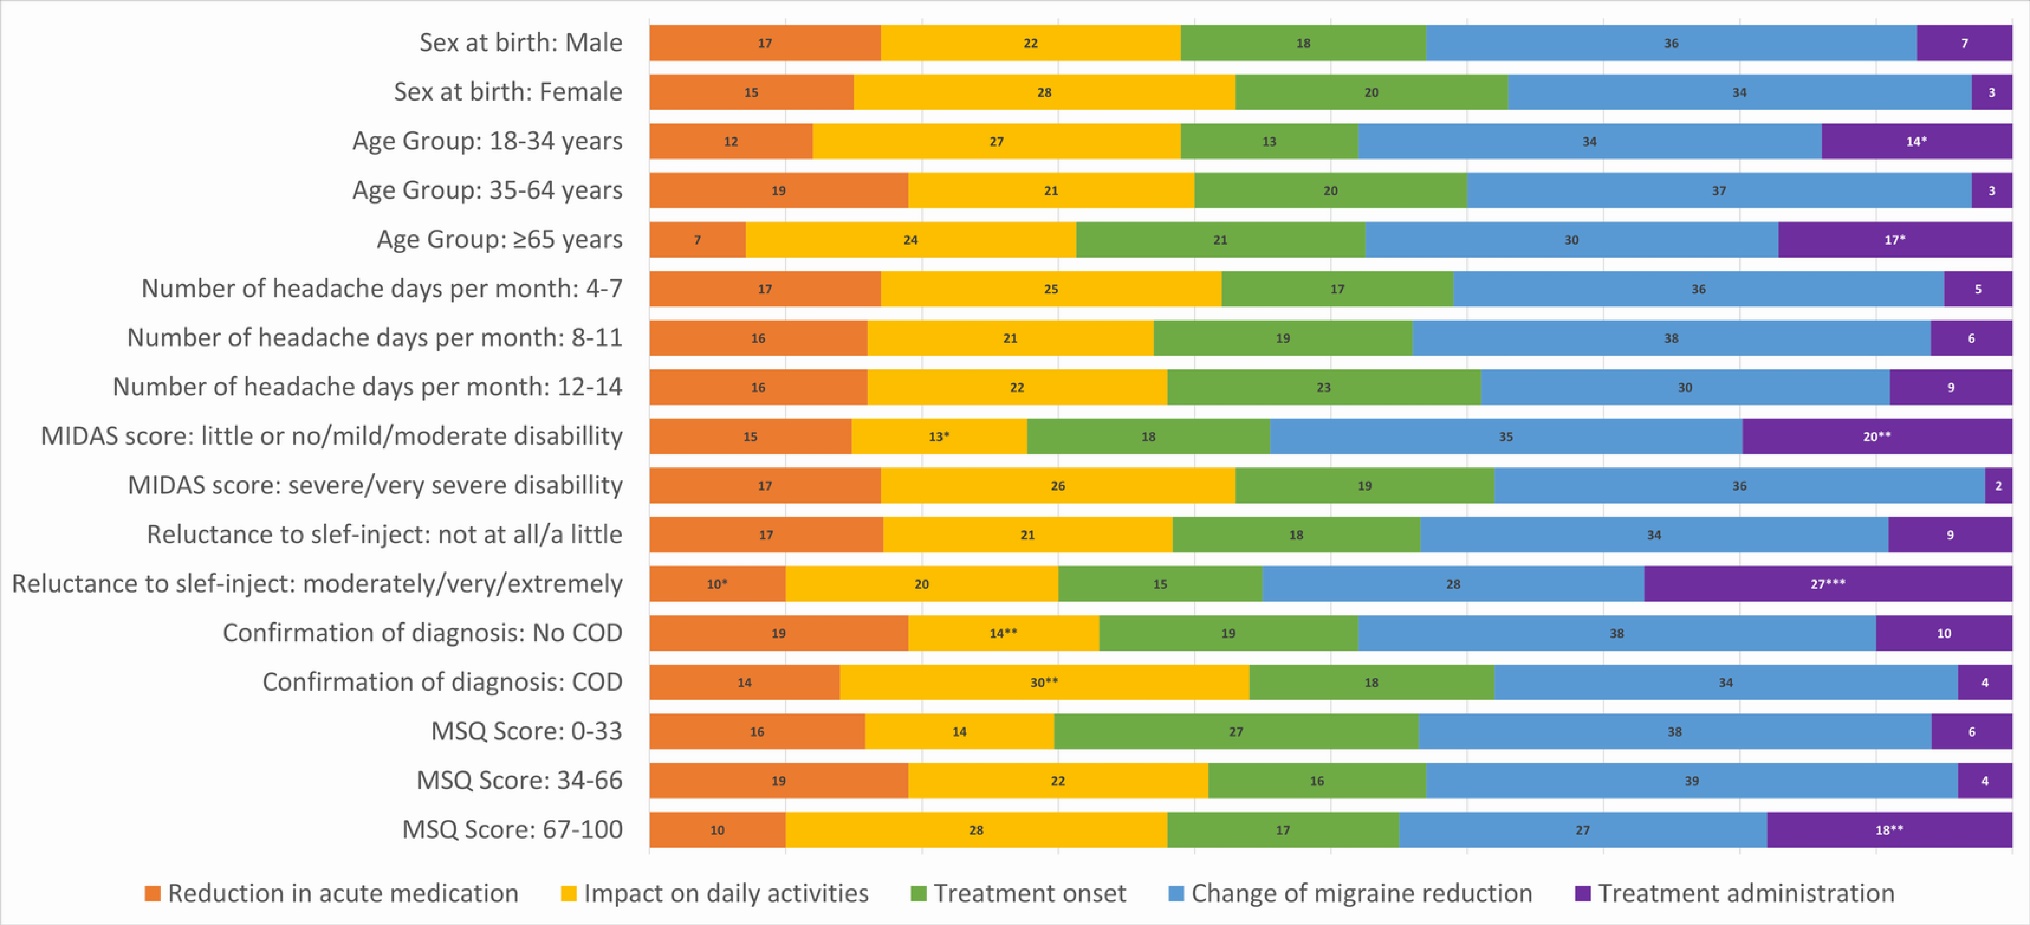


**Abbreviations**: COD, (physician’s) confirmation of diagnosis; MIDAS, Migraine Disability Assessment; MSQ, Migraine-Specific Quality of Life Questionnaire; RAI, relative attribute importance. *** indicates a p-value significantly different from that of the sample average of <0.1%, ** p-value <1%, * p-value <5%.

1. Tassorelli C, Diener H-C, Dodick DW, et al. Guidelines of the International Headache Society for controlled trials of preventive treatment of chronic migraine in adults. *Cephalalgia*. 2018;38(5):815-832. doi:10.1177/0333102418758283

2. Headache Classification Committee of the International Headache Society (IHS) The International Classification of Headache Disorders, 3rd edition. *Cephalalgia*. 2018;38(1):1-211. doi:10.1177/0333102417738202

3. Reed Johnson F, Lancsar E, Marshall D, et al. Constructing experimental designs for discrete-choice experiments: report of the ISPOR Conjoint Analysis Experimental Design Good Research Practices Task Force. *Value Health*. Jan-Feb 2013;16(1):3-13. doi:10.1016/j.jval.2012.08.2223

4. Clark MD, Determann D, Petrou S, Moro D, de Bekker-Grob EW. Discrete choice experiments in health economics: a review of the literature. *Pharmacoeconomics*. Sep 2014;32(9):883-902. doi:10.1007/s40273-014-0170-x

5. Vass C, Boeri M, Karim S, et al. Accounting for Preference Heterogeneity in Discrete-Choice Experiments: An ISPOR Special Interest Group Report. *Value Health*. May 2022;25(5):685-694. doi:10.1016/j.jval.2022.01.012

6. Nguyen TC, Robinson J, Kaneko S, Nguyen TC. Examining ordering effects in discrete choice experiments: A case study in Vietnam. *Economic Analysis and Policy*. 2015/03/01/ 2015;45:39-57. doi:https://doi.org/10.1016/j.eap.2015.01.003
